# Supplementary material for: The Role of 3D Printing in Planning Complex Medical Procedures and Training of Medical Professionals—Cross-Sectional Multispecialty Review
Source: MDPI journal article supplement (doi:10.3390/ijerph19063331), 2022-03-11
Supplement: s1 [file s1]

**Table S1.** Summary of the discussed 3D printing publications.

| Citation | Author             | Year | Field                               | Anatomy/Pathology                                                              | Type of Intervention                                          | Motive                                   |
|----------|--------------------|------|-------------------------------------|--------------------------------------------------------------------------------|---------------------------------------------------------------|------------------------------------------|
| 5        | Scanlan et al.     | 2018 | Pediatric Cardiac Surgery           | Atrioventricular valves                                                        | Valvular repair                                               | Specialized Training                     |
| 6        | Valverde et al.    | 2017 | Pediatric Cardiac Surgery           | Congenital heart defects                                                       | Better understand unique patient pathology                    | Visualize Pathology                      |
| 7        | Deng et al.        | 2021 | Pediatric Cardiac Surgery           | Ventricular septal defect                                                      | Better understand unique patient pathology                    | Visualize Pathology, Educate Patients    |
| 8        | Costello et al.    | 2015 | Pediatric Cardiac Surgery           | Ventricular septal defect                                                      | Better understand variations in the pathology                 | Specialized Training                     |
| 9        | Tiwari et al.      | 2021 | Pediatric Cardiac Surgery           | Congenital heart defects                                                       | Best route of intervention                                    | Procedure Planning                       |
| 10       | Valverde et al.    | 2015 | Pediatric Interventional Cardiology | Transverse aortic arch hypoplasia                                              | Planning endovascular stenting                                | Procedure Simulation                     |
| 11       | Phillips et al.    | 2016 | Pediatric Interventional Cardiology | Tetralogy of Fallot                                                            | Transcatheter pulmonary valve replacement                     | Procedure Planning                       |
| 12       | Jalal et al.       | 2018 | Pediatric Interventional Cardiology | Atrioventricular septal defect with left ventricular outflow tract obstruction | Hybrid melody valve implantation                              | Procedure Planning, Procedure Simulation |
| 13       | Bhatla et al.      | 2017 | Pediatric Interventional Cardiology | Ventricular septal defect                                                      | Right atriotomy with a tricuspid valve approach               | Procedure Planning                       |
| 14       | Sabiniewicz et al. | 2018 | Cardiac Structural Interventions    | Adults with congenital heart disease                                           | Transcatheter Pulmonary Valve Replacement                     | Procedure Planning, Procedure Simulation |
| 15       | Biernacka et al.   | 2018 | Cardiac Structural Interventions    | Adults with congenital heart disease                                           |                                                               | Procedure Planning                       |
| 16       | Schievano et al.   | 2007 | Cardiac Structural Interventions    | Adults with congenital heart disease                                           |                                                               | Procedure Planning                       |
| 17       | Ripley et al.      | 2016 | Cardiac Structural Interventions    | Aortic Valve pathology                                                         | Transcatheter aortic valve replacement                        | Procedure Simulation                     |
| 18       | Zelis et al.       | 2020 | Cardiac Structural Interventions    | Aortic Valve pathology                                                         | Transcatheter aortic valve implantation                       | Procedure Simulation                     |
| 19       | Qian et al.        | 2017 | Cardiac Structural Interventions    | Aortic Valve pathology                                                         | Paravalvular leaks in transcatheter aortic valve implantation | Procedure Simulation                     |
| 20       | Levin et al.       | 2020 | Cardiac Structural Interventions    | Structural valve deteriorations                                                | Valve in valve procedures                                     | Procedure Planning                       |
| 21       | Little et al.      | 2016 | Cardiac Structural Interventions    | Mitral valve pathology                                                         | Percutaneous mitral interventions                             | Procedure Planning                       |
| 22       | Wang et. al.       | 2016 | Cardiac Structural Interventions    | Mitral valve pathology                                                         | Transcatheter mitral valve replacement procedure              | Procedure Planning                       |
| 23       | Izzo et al.        | 2016 | Cardiac Structural Interventions    | Mitral Valve                                                                   | Transcatheter Native Mitral Valve Replacement                 | Procedure Planning                       |
| 24       | Holmes et al.      | 2014 | Cardiac Structural Interventions    | Left atrial appendage                                                          |                                                               |                                          |
| 25       | January et al.     | 2019 | Cardiac Structural Interventions    | Heart                                                                          | Arrhythmia                                                    |                                          |
| 26       | Wang et al.        | 2016 | Cardiac Structural Interventions    | Stroke with atrial fibrillation                                                | Percutaneous left atrial appendage closure                    | Specialized Training                     |
| 27       | Pellegrino et al.  | 2016 | Cardiac Structural Interventions    | Left atrial appendage                                                          | Transseptal puncture site and device sizing                   | Procedure Planning, Specialized Training |
| 28       | Otton et al.       | 2015 | Cardiac Structural Interventions    | Left atrial appendage                                                          | Transseptal puncture site and device sizing                   | Procedure Planning, Specialized Training |
| 29       | Hell et al.        | 2015 | Cardiac Structural Interventions    | Left atrial appendage                                                          | Transseptal puncture site and device sizing                   | Procedure Planning, Specialized Training |

|    |                        |      |                                  |                                                         |                                              |                                       |
|----|------------------------|------|----------------------------------|---------------------------------------------------------|----------------------------------------------|---------------------------------------|
| 30 | Li et al.              | 2017 | Cardiac Structural Interventions | Left atrial appendage                                   |                                              | Procedure Simulation                  |
| 31 | Sabiniewicz et al.     | 2020 | Cardiac Structural Interventions | Aortic arch aneurysm                                    |                                              | Procedure Planning                    |
| 32 | Cruz-Gonzalez et al.   | 2019 | Cardiac Structural Interventions | Valve pathology                                         | Transcatheter paravalvular leak closure      | Procedure Planning                    |
| 33 | ElGuindy et al.        | 2020 | Cardiac Structural Interventions | Valve pathology                                         | Transcatheter paravalvular leak closure      | Procedure Planning                    |
| 34 | Bellia-Munzon et al.   | 2020 | Pediatric Surgery                | Pectus excavatum                                        | Nuss procedure                               | Procedure Simulation, Custom Fit      |
| 35 | Huang et al.           | 2019 | Pediatric Surgery                | Pectus excavatum                                        | Nuss procedure                               | Procedure Simulation, Custom Fit      |
| 36 | Deng et al.            | 2020 | Pediatric Surgery                | Pectus excavatum                                        | Vacuum bells                                 | Custom Device                         |
| 37 | Villarreal et al.      | 2020 | Pediatric Surgery                | Conjoined twin                                          | Conjoined twin separation                    | Procedure Planning                    |
| 38 | Prayer et al.          | 2019 | Pediatric Surgery                | Congenital diaphragmatic hernias                        | Of patch placement                           | Procedure Planning                    |
| 39 | Sánchez-Sánchez et al. | 2018 | Pediatric Surgery                | Tumor                                                   | Oncological surgery                          | Procedure Planning                    |
| 40 | Beltrami et al.        | 2021 | Pediatric Surgery                | Musculoskeletal Tumor                                   | Surgical resection                           | Procedure Planning, Custom Implant    |
| 41 | Vanesa et al.          | 2020 | Pediatric Surgery                | Mandibular hypoplasia                                   | Mandibular distraction                       | Procedure Planning, Custom Implant    |
| 42 | Morrison et al.        | 2015 | Pediatric Surgery                | Tracheobronchomalacia                                   | Splints                                      | Custom Implant, Bioresorbable Splints |
| 43 | Pietrabissa et al.     | 2020 | General Surgery                  | Abdomen                                                 |                                              |                                       |
| 44 | Pankaj et al.          | 2019 | General Surgery                  | Kidney                                                  | Transplant                                   | Procedure Planning                    |
| 45 | Chandak et al.         | 2017 | General Surgery                  | Kidney                                                  | Transplant                                   | Procedure Planning                    |
| 46 | Stefania et al.        | 2017 | General Surgery                  | Kidney                                                  | Transplant                                   | Procedure Planning                    |
| 47 | Rui et al.             | 2018 | General Surgery                  | Biliary tree                                            | Choledochoscopic Examination                 | Procedure Simulation, Custom Device   |
| 48 | Hasan et al.           | 2016 | General Surgery                  | Pelvis                                                  | Percutaneous Nephrolithotripsy Surgery       | Specialized Training                  |
| 49 | Shibata et al.         | 2017 | General Surgery                  | Visceral Aneurysm                                       | Endovascular Embolization                    | Procedure Simulation                  |
| 51 | Marconi et al.         | 2016 | General Surgery                  | Pancreatic cancer                                       |                                              | Procedure Planning                    |
| 52 | Vater Fang et al.      | 2016 | General Surgery                  | Pancreatic cancer or cancer around the ampulla of Vater | Surgical resection                           | Procedure Planning                    |
| 53 | Bauermeister et al.    | 2016 | General Surgery                  | Pathologies of the skull                                | Various procedures                           | Procedure Planning                    |
| 54 | Richard et al.         | 2019 | General Surgery                  | Laryngotracheal stenosis                                | surgical correction                          | Procedure Simulation                  |
| 55 | Erdogan et al.         | 2021 | General Surgery                  | Nasal malformation                                      | External nasal splints                       | Custom Implant                        |
| 56 | Zhu et al.             | 2016 | General Surgery                  | Ear malformation                                        | Ear reconstruction surgery                   | Procedure Planning                    |
| 57 | Zein et al.            | 2013 | General Surgery                  | Liver failure                                           | Liver transplantation                        | Procedure Planning                    |
| 58 | Burdall et al.         | 2016 | General Surgery                  | Choledochal cyst                                        | Choledochal cyst excision and reconstruction | Specialized Training                  |
| 59 | Witowski et al.        | 2017 | General Surgery                  | Colorectal liver metastasis                             | Laparoscopic resection                       | Specialized Training                  |
| 60 | Pietrabissa et al.     | 2016 | General Surgery                  | Colorectal liver metastasis                             | Laparoscopic resection                       | Specialized Training                  |

|    |                   |      |                     |                                                   |                                                                                        |                                          |
|----|-------------------|------|---------------------|---------------------------------------------------|----------------------------------------------------------------------------------------|------------------------------------------|
| 61 | Huang et al.      | 2020 | Orthopedic Surgery  | Acetabular joint                                  | fracture                                                                               | Procedure Simulation                     |
| 62 | Kong et al.       | 2020 | Orthopedic Surgery  | Intra-Articular Distal Radius                     | fracture                                                                               | Procedure Planning                       |
| 63 | Chen et al.       | 2019 | Orthopedic Surgery  | Radius fracture                                   | Complex fractures of the distal radius                                                 | Procedure Planning, Educate Patients     |
| 64 | Wu et al.         | 2020 | Orthopedic Surgery  | Chronic Lateral Ankle Instability                 | Lateral Ankle Ligament Reconstruction                                                  | Procedure Planning                       |
| 65 | Park et al.       | 2021 | Orthopedic Surgery  | Pelvic tumor                                      |                                                                                        | Procedure Planning                       |
| 66 | Gu et al.         | 2020 | Orthopedic Surgery  | Knee                                              | Arthroplasty                                                                           | Procedure Planning, Procedure Simulation |
| 67 | Harrysson et al.  | 2008 | Orthopedic Surgery  |                                                   | Implant                                                                                |                                          |
| 68 | Mazzoli et al.    | 2009 | Orthopedic Surgery  | Cranium                                           | Implant                                                                                |                                          |
| 69 | Kantaros et al.   | 2021 | Orthopedic Surgery  |                                                   | Scaffolds                                                                              |                                          |
| 70 | Cheng et al.      | 2021 | Orthopedic Surgery  |                                                   | Bone Substitute                                                                        |                                          |
| 71 | Larson et al.     | 2020 | Orthopedic Surgery  |                                                   | Bioprinting                                                                            |                                          |
| 72 | Wang et al.       | 2021 | Orthopedic Surgery  |                                                   | Implant                                                                                |                                          |
| 73 | Chae et al.       | 2021 | Orthopedic Surgery  |                                                   | Implant                                                                                | Bioink                                   |
| 74 | Freundø et al.    | 2021 | Otorhinolaryngology | Hearing loss                                      | Cochlear implant surgery                                                               | Specialized Training                     |
| 75 | Frithioff et al.  | 2021 | Otorhinolaryngology | Temporal bone                                     |                                                                                        | Specialized Training                     |
| 76 | Barber et al.     | 2016 | Otorhinolaryngology | Temporal bone                                     | Defect repair                                                                          | Specialized Training                     |
| 77 | Zheng et al.      | 2019 | Otorhinolaryngology | Nasal Sinus                                       |                                                                                        | Procedure Planning, Specialized Training |
| 78 | Ferreira et al.   | 2021 | Otorhinolaryngology | External auditory canal and the tympanic membrane | Tympanic membrane paracentesis                                                         | Specialized Training, Student Training   |
| 79 | Gordon et al.     | 2021 | Otorhinolaryngology | Nasal malformation                                | Rhinoplasty                                                                            | Procedure Planning                       |
| 80 | Tretiakow et al.  | 2020 | Otorhinolaryngology | Nasal malformation                                | Simulating airflow                                                                     | Procedure Planning                       |
| 81 | Moniripiri et al. | 2021 | Otorhinolaryngology | Nasal Sinus                                       | Endoscopic sinus surgery                                                               | Specialized Training                     |
| 82 | Haemmerli et al.  | 2021 | Otorhinolaryngology | Nasal Sinus                                       | Endoscopic sinus surgery                                                               | Specialized Training                     |
| 83 | Valtonen et al.   | 2020 | Otorhinolaryngology | Nasal Sinus                                       | Endoscopic sinus surgery                                                               | Specialized Training                     |
| 84 | Deonarain et al.  | 2021 | Otorhinolaryngology | Larynx and trachea                                | Tracheostomy and reconstruction                                                        | Specialized Training                     |
| 85 | Sananes et al.    | 2021 | Otorhinolaryngology | Nasopharynx                                       | Taking a swab                                                                          | Specialized Training, Student Training   |
| 86 | Hidalgo et al.    | 1989 | Head & Neck Surgery | Mandible                                          | Reconstruction with a composite free fibula flap                                       |                                          |
| 87 | Mavrogenis et al. | 2019 | Head & Neck Surgery | Segmental mandibular defects                      | Reconstruction with a composite free fibula flap                                       | Procedure Planning                       |
| 88 | Pellini et al.    | 2012 | Head & Neck Surgery | Mandibular pathology                              | Conventional free-hand mandible reconstruction                                         | Procedure Planning, Specialized Training |
| 89 | Hirsch et al.     | 2009 | Head & Neck Surgery | Mandibular pathology                              | Computer-aided mandible reconstruction                                                 | Procedure Planning                       |
| 90 | Succo et al.      | 2015 | Head & Neck Surgery | Mandibular pathology                              | Computer-aided mandible reconstruction                                                 | Procedure Planning                       |
| 91 | Toto et al.       | 2015 | Head & Neck Surgery | Mandibular pathology                              | Conventional free-hand mandible reconstruction, computer-aided mandible reconstruction | Procedure Planning, Procedure Simulation |

|     |                   |      |                     |                                                            |                                                                                        |                                          |
|-----|-------------------|------|---------------------|------------------------------------------------------------|----------------------------------------------------------------------------------------|------------------------------------------|
| 92  | Culié et al.      | 2016 | Head & Neck Surgery | Mandibular pathology                                       | Conventional free-hand mandible reconstruction, computer-aided mandible reconstruction | Procedure Planning, Procedure Simulation |
| 93  | Blanc et al.      | 2019 | Head & Neck Surgery | Mandibular pathology                                       | Conventional free-hand mandible reconstruction, computer-aided mandible reconstruction | Procedure Planning, Procedure Simulation |
| 94  | Powcharoen et al. | 2019 | Head & Neck Surgery | Mandibular pathology                                       | Conventional free-hand mandible reconstruction, computer-aided mandible reconstruction | Procedure Planning, Procedure Simulation |
| 95  | Monaco et al.     | 2016 | Head & Neck Surgery | Mandibular pathology                                       | Conventional free-hand mandible reconstruction, computer-aided mandible reconstruction | Procedure Planning, Procedure Simulation |
| 96  | Wu et al.         | 2021 | Head & Neck Surgery | Mandibular pathology                                       | Conventional free-hand mandible reconstruction, computer-aided mandible reconstruction | Procedure Planning, Procedure Simulation |
| 97  | Tarsitano et al.  | 2018 | Head & Neck Surgery | Mandibular pathology                                       | Conventional free-hand mandible reconstruction, computer-aided mandible reconstruction | Procedure Planning, Procedure Simulation |
| 98  | Zweifel et al.    | 2015 | Head & Neck Surgery | Mandibular pathology                                       | Conventional free-hand mandible reconstruction, computer-aided mandible reconstruction | Procedure Planning, Procedure Simulation |
| 99  | Cogswell et al.   | 2020 | Neurosurgery        | Intracranial vasculature                                   |                                                                                        |                                          |
| 100 | Nagassa et al.    | 2019 | Neurosurgery        | Cerebral artery aneurysm                                   |                                                                                        | Procedure Simulation                     |
| 101 | Weinstock et al.  | 2015 | Neurosurgery        | Arteriovenous malformations and vein of Galen malformation |                                                                                        | Procedure Planning                       |
| 102 | Weinstock et al.  | 2017 | Neurosurgery        | Noncommunicating hydrocephalus                             | Endoscopic third ventriculostomy                                                       | Specialized Training                     |
| 103 | Randazzo et al.   | 2016 | Neurosurgery        | Brain tumor                                                | Resection                                                                              | Procedure Planning                       |
| 104 | Kosterhon et al.  | 2020 | Neurosurgery        | Skull base tumors                                          | Resection                                                                              | Procedure Planning                       |
| 105 | Cecchinato et al. | 2019 | Neurosurgery        | Spine deformity                                            | Spine deformity correction                                                             | Procedure Planning                       |
| 106 | Chen et al.       | 2019 | Neurosurgery        | Spine deformity                                            | Spine deformity correction                                                             | Procedure Planning                       |
| 107 | Clifton et al.    | 2020 | Neurosurgery        | Spine deformity                                            | Spine deformity correction                                                             | Procedure Planning                       |
| 108 | Weiss et al.      | 2019 | Neurosurgery        | Spine fractures                                            | Cervical laminectomy                                                                   | Specialized Training                     |
| 109 | Waran et al.      | 2015 | Neurosurgery        | Ventricles of the brain                                    | Ventriculostomy or transsphenoidal endoscopic pituitary surgeries                      | Specialized Training                     |

|     |                        |      |                                       |                                             |                                                 |                                            |
|-----|------------------------|------|---------------------------------------|---------------------------------------------|-------------------------------------------------|--------------------------------------------|
| 110 | Miller et al.          | 2018 | Gynecology and Obstetrics             | Congenital heart disease                    | Fetoscopic surgery                              | Procedure Planning                         |
| 111 | Flaxman et al.         | 2021 | Gynecology and Obstetrics             | Symptomatic uterine fibroids, endometriosis | Resection                                       | Procedure Planning                         |
| 112 | Sandrini et al.        | 2020 | Gynecology and Obstetrics             | Congenital heart disease                    |                                                 | Procedure Planning                         |
| 113 | Biglino et al.         | 2019 | Gynecology and Obstetrics             | Congenital heart disease                    |                                                 | Procedure Planning                         |
| 114 | Ruedinger et al.       | 2018 | Gynecology and Obstetrics             | Congenital heart disease                    |                                                 | Procedure Planning                         |
| 115 | Huang et al.           | 2021 | Gynecology and Obstetrics             | Congenital heart disease                    |                                                 | Procedure Planning                         |
| 116 | Abudayyeh et al.       | 2018 | Cardiac Structural Interventions      | Heart                                       |                                                 |                                            |
| 117 | Mitsouras et al.       | 2015 | Radiotherapy                          |                                             |                                                 |                                            |
| 118 | Otton et al.           | 2017 | Cardiac Structural Interventions      | Heart                                       |                                                 |                                            |
| 119 | Mackey et al.          | 2019 | Gynecology and Obstetrics             | Delivery                                    | Cesarean delivery                               | Specialized Training                       |
| 120 | Baek et al.            | 2016 | Gynecology and Obstetrics             | Cervical Cancer                             |                                                 | Procedure Planning                         |
| 121 | Barsky et al.          | 2018 | Gynecology and Obstetrics             | Pelvis                                      | Pessary                                         |                                            |
| 122 | Punyaratabandhu et al. | 2018 | Orthopedic Surgery                    | Cancer                                      |                                                 | Procedure Planning, Procedure Simulation   |
| 123 | Corona et al.          | 2018 | Orthopedic Surgery                    | Tibia                                       | Post-traumatic correction                       | Procedure Planning, Procedure Simulation   |
| 124 | Maddox et al.          | 2018 | Urology                               | Renal cancer                                | Robot-assisted partial nephrectomies            | Procedure Simulation                       |
| 125 | Komai et al.           | 2016 | Urology                               | Renal cancer                                | Resection                                       | Procedure Simulation                       |
| 126 | Porpiglia et al.       | 2018 | Urology                               | Prostate cancer                             | Robot-assisted radical prostatectomy            | Procedure Simulation                       |
| 127 | Shin et al.            | 2016 | Urology                               | Prostate cancer                             | Robot-assisted radical prostatectomy            | Procedure Simulation                       |
| 128 | Silberstein et al.     | 2014 | Urology                               | Prostate cancer                             | Robot-assisted radical prostatectomy            | Procedure Simulation                       |
| 129 | Jomoto et al.          | 2018 | Urology                               | Prostate cancer                             | Robot-assisted radical prostatectomy            | Procedure Simulation                       |
| 130 | Li et al.              | 2013 | Urology                               | Renal stones                                | Percutaneous nephrolithotomy                    | Procedure Planning                         |
| 131 | von Rundstedt et al.   | 2017 | Urology                               | Renal cancer                                | Robot-assisted laparoscopic partial nephrectomy | Procedure Simulation, Specialized Training |
| 132 | Wang et al.            | 2015 | Urology                               | Prostate cancer                             | Biopsy                                          | Procedure Simulation                       |
| 133 | Blankstein et al.      | 2015 | Urology                               | Bladder and kidney                          | Flexible ureteroscopy                           | Specialized Training                       |
| 134 | Park et al.            | 2015 | Urology                               | Ureteral reflux                             | Ureteral stents                                 | Custom Implant                             |
| 135 | Canvasser et al.       | 2017 | Urology                               |                                             | Surgical clips                                  | Custom Implant                             |
| 136 | Junco et al.           | 2015 | Urology                               |                                             | Trocars                                         | Custom Device                              |
| 137 | Ali et al.             | 2019 | Urology                               | Kidney                                      |                                                 | Bioprinting                                |
| 138 | de Kemp et al.         | 2015 | Urology                               | Urethra                                     | Reconstruction                                  |                                            |
| 139 | Chen et al.            | 2020 | Urology                               |                                             |                                                 |                                            |
| 140 | Cacciamani et al.      | 2019 | Urology                               |                                             |                                                 |                                            |
| 141 | Atalay et al.          | 2017 | Urology                               | Pelvis                                      |                                                 |                                            |
| 142 | Pang et al.            | 2020 | Emergency Medicine and Anesthesiology | Pelvis                                      |                                                 | Specialized Training, Student Training     |

|     |                    |      |                                       |                            |                                                          |                                                         |
|-----|--------------------|------|---------------------------------------|----------------------------|----------------------------------------------------------|---------------------------------------------------------|
| 143 | Baribeau et al.    | 2020 | Emergency Medicine and Anesthesiology | Thorax                     | Perioperative transthoracic echocardiography             | Specialized Training                                    |
| 144 | Lord et al.        | 2021 | Emergency Medicine and Anesthesiology | Thorax                     | Pericardiocentesis                                       | Specialized Training                                    |
| 145 | Tan et al.         | 2021 | Emergency Medicine and Anesthesiology |                            | Ultrasound-guided peripheral intravenous catheterization | Specialized Training                                    |
| 146 | Engelbrecht et al. | 2020 | Emergency Medicine and Anesthesiology |                            | Intraosseous technique                                   | Specialized Training, Student Training                  |
| 147 | Maier et al.       | 2021 | Emergency Medicine and Anesthesiology | Airway                     | Bronchoscopy                                             | Specialized Training                                    |
| 148 | Leong et al.       | 2021 | Emergency Medicine and Anesthesiology | Airway                     | Bronchoalveolar lavage and clearing of secretions        | Specialized Training                                    |
| 149 | Ho et al.          | 2019 | Emergency Medicine and Anesthesiology | Airway                     | Bronchoscopy in the setting of airway pathology          | Specialized Training                                    |
| 150 | Kei et al.         | 2019 | Emergency Medicine and Anesthesiology | Airway                     | Cricothyrotomy                                           | Specialized Training, Student Training                  |
| 151 | Dziedzic et al.    | 2020 | Emergency Medicine and Anesthesiology | Tracheobronchomalacia      | Mesh and ring                                            | Procedure Planning, Procedure Simulation                |
| 152 | Han et al.         | 2020 | Emergency Medicine and Anesthesiology | Lumbar spine               | Epidural analgesia                                       | Specialized Training, Student Training                  |
| 153 | Odom et al.        | 2019 | Emergency Medicine and Anesthesiology | Lumbar spine               | Palpate and ultrasound-guided lumbar punctures           | Specialized Training, Student Training                  |
| 154 | Park et al.        | 2021 | Emergency Medicine and Anesthesiology | Airway                     | Endotracheal intubation                                  | Procedure Planning                                      |
| 155 | Shaylor et al.     | 2020 | Emergency Medicine and Anesthesiology | Airway                     | Ventilation                                              | Procedure Planning                                      |
| 156 | Olomu et al.       | 2020 | Emergency Medicine and Anesthesiology | Airway                     | Ventilation                                              | Procedure Planning                                      |
| 157 | Han et al.         | 2016 | Emergency Medicine and Anesthesiology | Airway                     | Ventilation                                              | Procedure Planning                                      |
| 158 | Atun et al.        | 2015 | Emergency Medicine and Anesthesiology | Airway                     | Evaluation                                               | Procedure Planning                                      |
| 159 | Rooney et al.      | 2020 | Radiotherapy                          | Cancer                     |                                                          |                                                         |
| 160 | Dyer et al.        | 2020 | Radiotherapy                          | Head and neck cancer       | Bolus for radiotherapy                                   | Procedure Planning, Custom Device                       |
| 161 | Lee et al.         | 2018 | Radiotherapy                          | Prostate cancer            |                                                          |                                                         |
| 162 | Biltekin et al.    | 2021 | Radiotherapy                          |                            | Bolus for radiotherapy                                   | Procedure Planning, Custom Device                       |
| 163 | Craft et al.       | 2018 | Radiotherapy                          |                            | Bolus for radiotherapy                                   | Procedure Planning, Custom Device                       |
| 164 | Hazelaar et al.    | 2018 | Radiotherapy                          | Thorax                     | Bolus for radiotherapy                                   | Procedure Planning, Custom Device                       |
| 165 | Biltekin et al.    | 2020 | Radiotherapy                          | Vagina                     | Brachytherapy                                            |                                                         |
| 166 | Logar et al.       | 2019 | Radiotherapy                          | Female reproductive cancer | Brachytherapy gynecological applicators                  | Procedure Planning, Specialized Training, Custom Device |
| 167 | Semeniuk et al.    | 2021 | Radiotherapy                          |                            | Brachytherapy                                            |                                                         |
| 168 | Arenas et al.      | 2017 | Radiotherapy                          | Skin                       | Skin cancer applicators                                  | Procedure Planning, Specialized Training, Custom Device |
| 169 | Chen et al.        | 2021 | Radiotherapy                          |                            |                                                          |                                                         |
| 170 | Chiu et al.        | 2020 | Radiotherapy                          | Prostate                   | Interstitial brachytherapy                               | Specialized Training, Custom Device                     |
| 171 | Doyle et al.       | 2021 | Radiotherapy                          | Prostate                   | Brachytherapy                                            | Specialized Training                                    |
| 172 | Campelo et al.     | 2020 | Radiotherapy                          | Pelvis                     | Gynecological phantom                                    | Specialized Training, Custom Device                     |
